# Supplementary material for: Synergetic efficiency: in situ growth of a novel 2D/2D chemically bonded Bi2O3/Cs3Bi2Br9 S-scheme heterostructure for improved photocatalytic performance and stability
Source: Royal Society of Chemistry journal article supplement (doi:10.1039/d4na01047g), 2025-01-01
Supplement: d4na01047g1.pdf [file d4na01047g1.pdf]

## Supplementary Martial

### Synergetic Efficiency: In Situ Growth of Novel 2D/2D Chemically Bonded $\text{Bi}_2\text{O}_3/\text{Cs}_3\text{Bi}_2\text{Br}_9$ S-Scheme Heterostructure for Improved Photocatalytic Performance and Stability

Mohamed Masri<sup>a,b</sup>, Girisha. K. B<sup>b</sup>, Abdo Hezam<sup>c,d</sup>, Khaled Alkanad<sup>e</sup>, Talal F. Qahtan<sup>f</sup>, Qasem A. Drmogh<sup>g,h</sup>, Kalappa Prashantha<sup>a</sup>, Manjunath S. H<sup>b</sup>, Sanaa Mohammed Abdu Kaid<sup>a</sup>, K. Byrappa<sup>a</sup>, Faten Masri<sup>i,\*</sup>

<sup>a</sup> Center for Research and Innovations, BGS Institute of Technology, Adichunchanagiri University, B. G. Nagar, Karnataka, India.

<sup>b</sup> Department of Mechanical Engineering, BGS Institute of Technology, Adichunchanagiri University, B. G. Nagar, Karnataka, India.

<sup>c</sup> Leibniz-Institute for Catalysis, University of Rostock, 18059 Rostock, Germany.

<sup>d</sup> Industrial Chemistry and Heterogeneous Catalysis, Department of Chemistry, TUM School of Natural Sciences, Technical University of Munich, 85748 Garching, Germany

<sup>e</sup> Department of Studies in Physics, University of Mysore, Manasagangotri, Mysuru, Karnataka, India.

<sup>f</sup> Physics Department, College of Science and Humanities in Al-Kharj, Prince Sattam Bin Abdulaziz University, Al-kharj 11942, Saudi Arabia

<sup>g</sup> Interdisciplinary Research Centre for Hydrogen Technologies and Carbon Management, King Fahd University of Petroleum and Minerals (KFUPM), Dhahran, 31261, Saudi Arabia

<sup>h</sup> Department of Materials Science and Engineering, King Fahd University of Petroleum and Minerals (KFUPM), Dhahran, 31261, Saudi Arabia

<sup>i</sup> Department of Production Engineering, Faculty of Mechanical Engineering, University of Aleppo, Aleppo, Syria.

\* Corresponding author: E-mail address: [faten.masri.or@gmail.com](mailto:faten.masri.or@gmail.com)

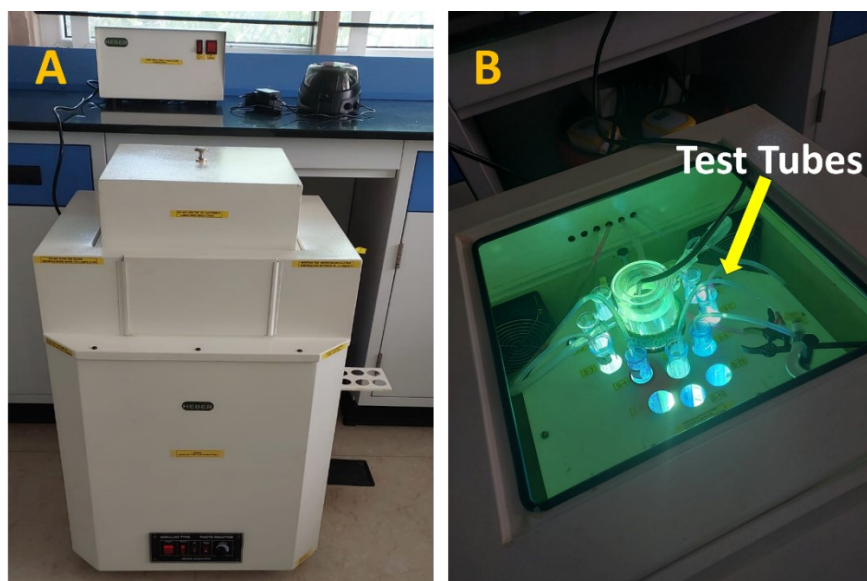

**Fig. S1.** A. Photocatalytic instrument, B. Top view of the instrument

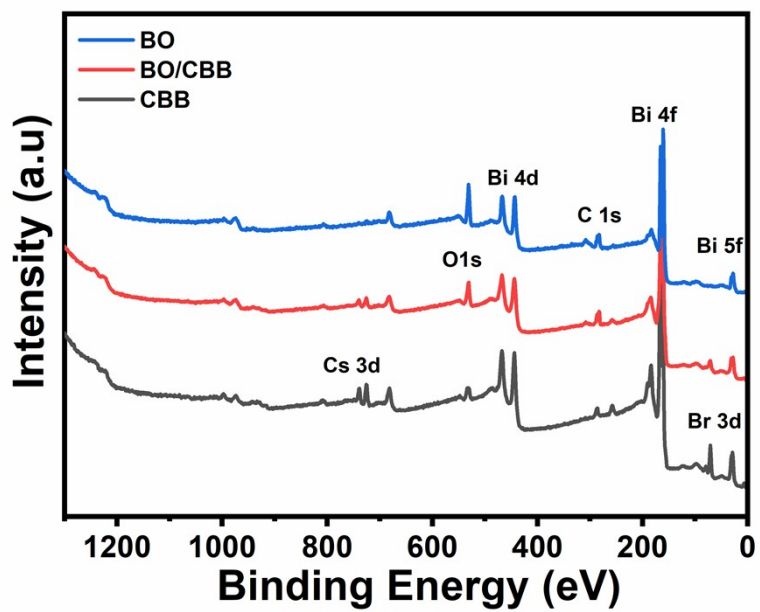

Fig. S2. Survey spectra of BO, CBB, and BO/CBB 28%

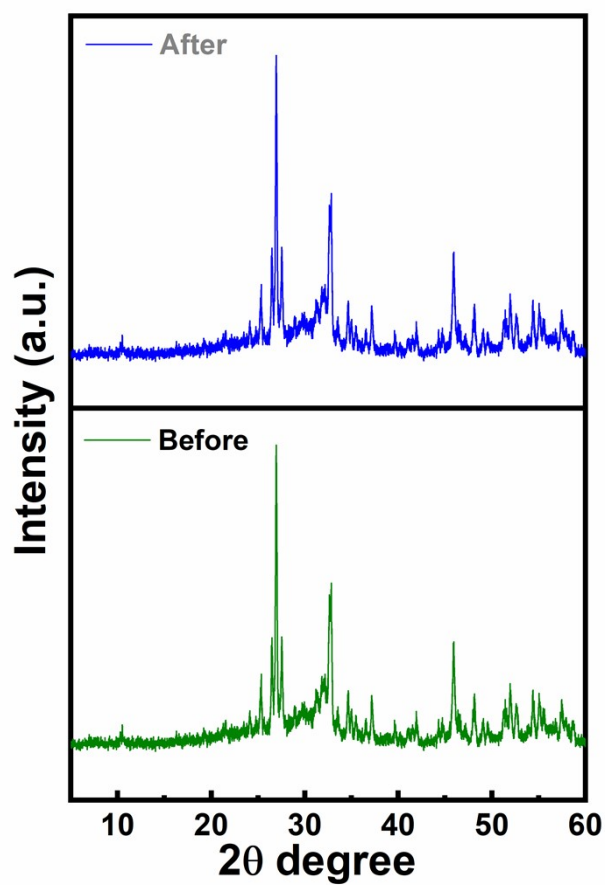

Fig. S3. XRD patterns of BO/CBB28% before and after four repeated cycles.

**Table S1:** Comparison of photocatalytic performance of various photocatalysts for degradation of dyes.

| Photocatalyst                                                                          | Irradiation   | Pollutant          | Time    | Degradation | Ref.         |
|----------------------------------------------------------------------------------------|---------------|--------------------|---------|-------------|--------------|
| CsSnBr <sub>3</sub>                                                                    | Visible light | crystal violet dye | 120 min | 73.1%       | [S1]         |
| Cs <sub>3</sub> Bi <sub>2</sub> I <sub>9</sub>                                         | Visible light | RhB                | 180 min | 93%         | [S2]         |
| Cs <sub>3</sub> Bi <sub>2</sub> I <sub>9</sub> -OA                                     | Visible light | MB in water        | 60 min  | 62.1%       | [S3]         |
| Cs <sub>3</sub> Bi <sub>2</sub> I <sub>9</sub> -OA                                     | Visible light | MB in water        | 60 min  | 62.6%       | [S3]         |
| Cs <sub>3</sub> Bi <sub>2</sub> Br <sub>9</sub> -<br>OA/Ag <sub>2</sub> S              | Visible light | MB in water        | 60 min  | 40.13%      | [S3]         |
| Cs <sub>3</sub> Bi <sub>2</sub> Br <sub>9</sub> -OA/TiO <sub>2</sub>                   | Visible light | MB in water        | 60 min  | 27.6%       | [S3]         |
| Cs <sub>3</sub> Bi <sub>2</sub> Br <sub>9</sub>                                        | Visible light | MB in isopropanol  | 60 min  | 66.3%       | [S3]         |
| Cs <sub>3</sub> Bi <sub>2</sub> Br <sub>9</sub> -OA<br>NCs                             | Visible light | MB in isopropanol  | 60 min  | 58.8%       | [S3]         |
| Cu doped TiO <sub>2</sub>                                                              | Visible light | MB in water        | 300 min | 81.22%      | [S4]         |
| Ni doped TiO <sub>2</sub>                                                              | Visible light | MB in water        | 300 min | 71.18%      | [S4]         |
| Co doped TiO <sub>2</sub>                                                              | Visible light | MB in water        | 300 min | 66.17%      | [S4]         |
| Fe doped TiO <sub>2</sub>                                                              | Visible light | MB in water        | 300 min | 1.41%       | [S4]         |
| Mn doped TiO <sub>2</sub>                                                              | Visible light | MB in water        | 300 min | 16.41%      | [S4]         |
| 10%Bi <sub>2</sub> O <sub>3</sub> @TiO <sub>2</sub>                                    | Visible light | MB in water        | 300 min | 11.47%      | [S4]         |
| $\alpha$ - $\beta$ Bi <sub>2</sub> O <sub>3</sub>                                      | sunlight      | RhB in water       | 120 min | 99.6%       | [S5]         |
| Bi <sub>2</sub> O <sub>2</sub> CO <sub>3</sub>                                         | UV light      | MB in water        | 300 min | 64.19%      | [S6]         |
| Cs <sub>3</sub> Bi <sub>2</sub> Br <sub>9</sub>                                        | Visible light | MO in water        | 90 min  | 92%         | [S7]         |
| Cs <sub>3</sub> Bi <sub>2</sub> Br <sub>9</sub>                                        | Visible light | MB in water        | 90 min  | 80%         | [S7]         |
| Cs <sub>3</sub> Bi <sub>2</sub> Br <sub>9</sub>                                        | Visible light | RhB in water       | 90 min  | 85%         | [S7]         |
| Bi <sub>2</sub> O <sub>3</sub>                                                         | Visible light | MB in water        | 60 min  | 65%         | This<br>work |
| Bi <sub>2</sub> O <sub>3</sub> /Cs <sub>3</sub> Bi <sub>2</sub> Br <sub>9</sub><br>56% | Visible light | MB in water        | 60 min  | 89%         | This<br>work |
| Bi <sub>2</sub> O <sub>3</sub> /Cs <sub>3</sub> Bi <sub>2</sub> Br <sub>9</sub><br>28% | Visible light | MB in water        | 60 min  | 92%         | This<br>work |

**Effect of pH level:** The impact of the pH level plays an important factor in achieving high-efficiency photocatalytic activity. The photocatalytic degradation of MB by the optimal BO/CBB 28% composite was carried out at different pH levels (3, 7, 9). Fig. S4 revealed that the studied sample did not show much difference in the degradation of MB with different pH levels. The photocatalytic activity in an acidic medium (pH = 3) achieved the best MB degradation efficiency among the three levels. Whereas the MB degradation in the alkaline medium (pH = 9) by the sample was lower than at pH = 7. However, this slight difference in the degradation of MB by the BO/CBB 28% composite might be attributed to the fact that the

changes in the charge surface of the photocatalyst at different pH media. This result is consistent with reported studies [S8, S9].

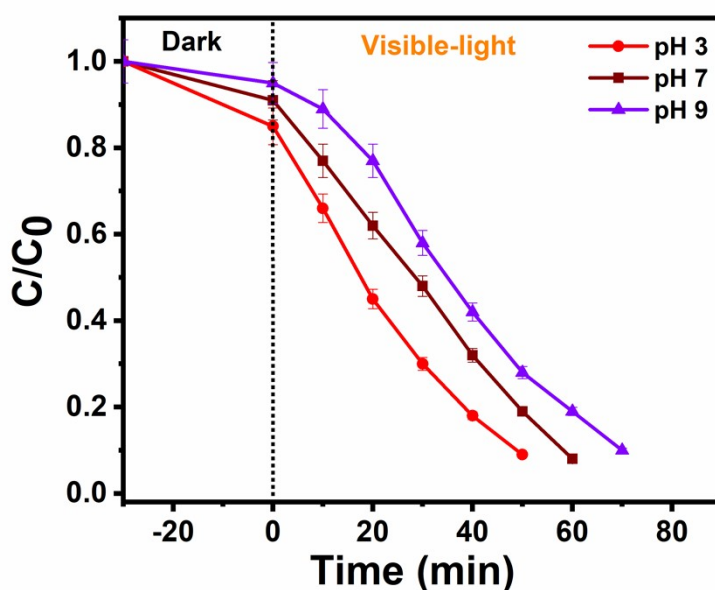

Fig. S4 pH level effect

## References

- [S1] Huynh KA, Nguyen DL, Nguyen VH, Vo DV, Trinh QT, Nguyen TP, Kim SY, Le QV. Halide perovskite photocatalysis: progress and perspectives. *Journal of Chemical Technology & Biotechnology*. 2020 Oct;95(10):2579-96.
- [S2] Bresolin BM, Günnemann C, Bahnemann DW, Sillanpää M. Pb-Free Cs<sub>3</sub>Bi<sub>2</sub>I<sub>9</sub> perovskite as a visible-light-active photocatalyst for organic pollutant degradation. *Nanomaterials*. 2020 Apr;10(4):763.
- [S3] Bhattacharjee S, Chaudhary SP, Bhattacharyya S. Lead-free metal halide perovskite nanocrystals for photocatalysis in water. *Chem Rxiv* 2019.
- [S4] Kerkez-Kuyumcu Ö, Kibar E, Dayıoğlu K, Gedik F, Akın AN, Özkara-Aydınoğlu Ş. A comparative study for removal of different dyes over M/TiO<sub>2</sub> (M= Cu, Ni, Co, Fe, Mn and Cr) photocatalysts under visible light irradiation. *Journal of Photochemistry and Photobiology A: Chemistry*. 2015 Oct 1; 311:176-85.
- [S5] Bera KK, Chakraborty M, Mondal M, Banik S, Bhattacharya SK. Synthesis of  $\alpha$ - $\beta$  Bi<sub>2</sub>O<sub>3</sub> heterojunction photocatalyst and evaluation of reaction mechanism for degradation of RhB dye under natural sunlight. *Ceramics International*. 2020 Apr 15;46(6):7667-80.
- [S6] Nguyen TT, Le TT, Nguyen TB, Thi TN, Tran LB, Nguyen TQ, Nguyen NH. Effect of pH on the Performance of Bi<sub>2</sub>O<sub>2</sub>CO<sub>3</sub> Nanoplates for Methylene Blue Removal in Water by

Adsorption and Photocatalysis. Bulletin of Chemical Reaction Engineering & Catalysis. 2022 Jun 30;17(2):331-9.

[S7] Masri M, Girisha KB, Hezam A, Qahtan TF, Alkanad K, Masri F, Namratha K, Byrappa K. Enhanced photocatalytic activity and stability of 2D Cs<sub>3</sub>Bi<sub>2</sub>Br<sub>9</sub> perovskite nanosheets synthesized via modified antisolvent method. Colloids and Surfaces C: Environmental Aspects. 2024 Nov 1; 2:100024.

[S8] Prabhu S, Nithya A, Mohan SC, Jothivenkatachalam K. Synthesis, surface acidity and photocatalytic activity of WO<sub>3</sub>/TiO<sub>2</sub> nanocomposites—an overview. In Materials Science Forum 2014 Jun 1 (Vol. 781, pp. 63-78). Trans Tech Publications Ltd.

[S9] Meng J, Ashry AG, Abou-Elyazed AS, Zhang Z, Li X, Sharara TZ, El-Demerdash SH. Highly Efficient Visible-Light Photocatalysts: Bi<sub>2</sub>O<sub>3</sub>@TiO<sub>2</sub> Derived from Ti-MOFs for Eriochrome Black T Degradation: A Joint Experimental and Computational Study. Catalysts. 2024 Nov 17;14(11):829.
